# Supplementary material
Source: bioRxiv or medRxiv preprint supplement (https://www.biorxiv.org/highwire/filestream/101691/field_highwire_adjunct_files/2/307835-3.pdf)
Supplement: Supplementary file [file 307835-3.pdf]

## **SUPPLEMENTARY INFORMATION**

### **Enrichment of rare protein truncating variants in amyotrophic lateral sclerosis patients**

#### **Supplementary Tables**

Table S1. QC filtering criteria

Table S2. Neurodegenerative disease genes

Table S3. Annotated variants across allele frequency categories.

Table S4. Proposed ALS genes and their signals in this study under the protein-truncating variant model.

Table S5. Proposed ALS genes and their signals in this study under the damaging missense variant model.

#### **Supplementary Figures**

Figure S1. Initial QC

Figure S2. Sex imputation

Figure S3. PCA

Figure S4. PCA with 1000 Genomes

Figure S5. IBD/relatedness check

Figure S6. Exome wide analysis of variants in ALS cases and controls (Model 1)

Figure S7. Exome wide analysis of variants in ALS cases and controls (Model 2)

Figure S8. Exome wide analysis of variants in ALS cases and controls (Model 4)

Figure S9. All models together

Figure S10. Extension of Figure 1

Figure S11. Extension of Figure 2A

Figure S12. Extension of Figure 2B

Figure S13. Extension of Figure 3A

Figure S14. Extension of Figure 3B

Figure S15. Extension of Figure 3C

Figure S16. QQ plots (UR PTV and dmis)

Figure S17. QQ plots (RV PTV and dmis)

Figure S18. QQ plots (RV PTV and dmis) with additional controls

**Table S1. Dataset quality control**

| Quality control criteria applied                                                                                                                   | Total  | Cases | Controls |
|----------------------------------------------------------------------------------------------------------------------------------------------------|--------|-------|----------|
| Total samples in initial dataset                                                                                                                   | 15,722 | 5,073 | 10,649   |
| Samples successfully incorporated into VCF                                                                                                         | 15,428 | 4,851 | 10,577   |
| Initial sample QC:<br>(1) Removed call rate <90<br>(2) Removed dp Mean <10<br>(3) Removed gq Mean <65                                              | 14,143 | 4,569 | 10,575   |
| Sex imputation:<br>(1) Removed samples with ambiguous sex                                                                                          | 15,128 | 4,558 | 10,570   |
| Principal component analysis:<br>(1) Case vs controls<br>(2) Case, controls, and 1000 Genomes<br>(3) Isolated overlapping case and control samples | 12,317 | 4,429 | 7,888    |
| Identity by descent:<br>(1) Removed related or duplicated samples, IBD > 0.2                                                                       | 11,703 | 3,864 | 7,839    |

**Table S2. Neurodegenerative disease genes**

|                |                |                |               |                  |               |               |               |                |                 |               |
|----------------|----------------|----------------|---------------|------------------|---------------|---------------|---------------|----------------|-----------------|---------------|
| <i>ABCA7</i>   | <i>BST1</i>    | <i>CSF1R</i>   | <i>ECHDC3</i> | <i>GCH1</i>      | <i>ITM2B</i>  | <i>NR4A2</i>  | <i>PLD3</i>   | <i>SCARB2</i>  | <i>SPPL2A</i>   | <i>TYROBP</i> |
| <i>ACMSD</i>   | <i>C9orf72</i> | <i>DAO</i>     | <i>EIF4G1</i> | <i>GIGYF2</i>    | <i>LRRK2</i>  | <i>NUCKS1</i> | <i>PM20D1</i> | <i>SCIMP</i>   | <i>SQSTM1</i>   | <i>UBA1</i>   |
| <i>ALS2</i>    | <i>CASS4</i>   | <i>DCTN1</i>   | <i>EPHA1</i>  | <i>GPNUMB</i>    | <i>MAPT</i>   | <i>OPTN</i>   | <i>PNPLA6</i> | <i>SETX</i>    | <i>STK39</i>    | <i>UBQLN2</i> |
| <i>ANG</i>     | <i>CCDC62</i>  | <i>DDRGI1</i>  | <i>FAM47E</i> | <i>GRN</i>       | <i>MC1R</i>   | <i>PANK2</i>  | <i>PRNP</i>   | <i>SIGMAR1</i> | <i>STX1B</i>    | <i>UCHL1</i>  |
| <i>APOE</i>    | <i>CD2AP</i>   | <i>DGKQ</i>    | <i>FBXO7</i>  | <i>HBEGF</i>     | <i>MCCC1</i>  | <i>PARK2</i>  | <i>PRPH</i>   | <i>SIPA1L2</i> | <i>TAF15</i>    | <i>UNC13A</i> |
| <i>APP</i>     | <i>CD33</i>    | <i>DLG2</i>    | <i>FERMT2</i> | <i>HLA-DRB5</i>  | <i>MEF2C</i>  | <i>PARK7</i>  | <i>PSEN1</i>  | <i>SLC24A4</i> | <i>TARDBP</i>   | <i>VAPB</i>   |
| <i>AR</i>      | <i>CELF1</i>   | <i>DNAJC13</i> | <i>FGF20</i>  | <i>HNRNPA1</i>   | <i>MS4A4E</i> | <i>PARL</i>   | <i>PSEN2</i>  | <i>SMN1</i>    | <i>TBK1</i>     | <i>VCP</i>    |
| <i>ARPP21</i>  | <i>CENPV</i>   | <i>DNAJC6</i>  | <i>FIG4</i>   | <i>HNRNPA2B1</i> | <i>MS4A6A</i> | <i>PFN1</i>   | <i>PTGER2</i> | <i>SMN2</i>    | <i>TMEM163</i>  | <i>VPS13C</i> |
| <i>ATP13A2</i> | <i>CHMP2B</i>  | <i>DNMT1</i>   | <i>FUS</i>    | <i>HTRA2</i>     | <i>NEFH</i>   | <i>PICALM</i> | <i>PTK2B</i>  | <i>SNCA</i>    | <i>TMEM175</i>  | <i>VPS35</i>  |
| <i>ATXN2</i>   | <i>CLU</i>     | <i>DSG2</i>    | <i>GAK</i>    | <i>INPP5D</i>    | <i>NEK1</i>   | <i>PINK1</i>  | <i>RAB7L1</i> | <i>SOD1</i>    | <i>TMEM229B</i> | <i>ZCWPW1</i> |
| <i>BIN1</i>    | <i>CRI</i>     | <i>DYNC1H1</i> | <i>GBA</i>    | <i>INPP5F</i>    | <i>NME8</i>   | <i>PLA2G6</i> | <i>RIT2</i>   | <i>SORL1</i>   | <i>TREM2</i>    |               |

**Table S3. Annotated variants across allele frequency categories**

| Number of variants         | Singletons<br>(AC=1) | Doubletons<br>(AC=2) | Ultra-rare singletons<br>(AC=1) | Rare variants<br>(MAF <0.01%) |
|----------------------------|----------------------|----------------------|---------------------------------|-------------------------------|
| <b>Total</b>               | 536,415              | 232,452              | 309,281                         | 2,802,758                     |
| <b>Per case (3,864)</b>    | 14-216               | 5-114                | 4-100                           | 164-738                       |
| <b>Per control (7,839)</b> | 7-199                | 3-92                 | 5-95                            | 173-583                       |

Abbreviations are as follows: AC, allele count; MAF, minor allele frequency. The different frequency thresholds are as follows: (1) singletons (AC=1); (2) doubletons (AC=2); (3) ultra-rare singletons (AC=1, DiscovEHR=0); and (4) rare variants (MAF <0.01 in our dataset; ExAC (non-psychiatric studies, >45,000 samples); and in DiscovEHR (>50,000 samples)).

**Table S4. Proposed ALS genes and their signals under the protein-truncating variant model**

| Gene             | Qualifying variants in cases (3,864) | Qualifying variants in controls (7,839) | Qualifying variants in total controls (28,910) | OR<br>N <sub>cases</sub> : 3,864<br>N <sub>controls</sub> : 7,839 | P-value<br>N <sub>cases</sub> : 3,864<br>N <sub>controls</sub> : 7,839 | OR<br>N <sub>cases</sub> : 3,864<br>N <sub>controls</sub> : 28,910 | P-value<br>N <sub>cases</sub> : 3,864<br>N <sub>controls</sub> : 28,910 |
|------------------|--------------------------------------|-----------------------------------------|------------------------------------------------|-------------------------------------------------------------------|------------------------------------------------------------------------|--------------------------------------------------------------------|-------------------------------------------------------------------------|
| <i>ALS2</i>      | 2                                    | 5                                       | 17                                             | 0.81                                                              | 1.00                                                                   | 0.88                                                               | 1.00                                                                    |
| <i>ANG</i>       | NA                                   | NA                                      | NA                                             | NA                                                                | NA                                                                     | NA                                                                 | NA                                                                      |
| <i>ARHGEF28</i>  | 5                                    | 4                                       | 16                                             | 2.54                                                              | 0.17                                                                   | 2.34                                                               | 0.09                                                                    |
| <i>ARPP21</i>    | 0                                    | 1                                       | 10                                             | 0.68                                                              | 1.00                                                                   | 0.36                                                               | 0.62                                                                    |
| <i>ATXN2</i>     | 0                                    | 1                                       | 45                                             | 0.68                                                              | 1.00                                                                   | 0.08                                                               | 8.38x10 <sup>-3</sup> #                                                 |
| <i>C21orf2</i>   | 1                                    | 2                                       | 9                                              | 1.01                                                              | 0.02                                                                   | 0.84                                                               | 1.00                                                                    |
| <i>C9orf72</i>   | 1                                    | 2                                       | 13                                             | 1.01                                                              | 0.02                                                                   | 0.58                                                               | 1.00                                                                    |
| <i>CENPV</i>     | NA                                   | NA                                      | NA                                             | NA                                                                | NA                                                                     | NA                                                                 | NA                                                                      |
| <i>CHMP2B</i>    | 4                                    | 1                                       | 31                                             | 8.12                                                              | 0.04                                                                   | 0.97                                                               | 1.00                                                                    |
| <i>DAO</i>       | 0                                    | 2                                       | 27                                             | 0.41                                                              | 1.00                                                                   | 0.14                                                               | 0.07                                                                    |
| <i>DCTN1</i>     | 1                                    | 1                                       | 9                                              | 2.03                                                              | 0.55                                                                   | 0.83                                                               | 1.00                                                                    |
| <i>FIG4</i>      | 9                                    | 13                                      | 51                                             | 1.41                                                              | 0.50                                                                   | 1.32                                                               | 0.42                                                                    |
| <i>FUS</i>       | 6                                    | 0                                       | 0                                              | 26.41                                                             | 1.29x10 <sup>-3</sup>                                                  | 97.40                                                              | 2.68x10 <sup>-6</sup> #                                                 |
| <i>GRN</i>       | 1                                    | 1                                       | 8                                              | 2.03                                                              | 0.55                                                                   | 0.94                                                               | 1.00                                                                    |
| <i>HNRNPA1</i>   | 0                                    | 1                                       | 18                                             | 0.68                                                              | 1.00                                                                   | 0.20                                                               | 0.26                                                                    |
| <i>HNRNPA2B1</i> | NA                                   | NA                                      | NA                                             | NA                                                                | NA                                                                     | NA                                                                 | NA                                                                      |
| <i>KIF5A</i>     | 3                                    | 0                                       | 2                                              | 14.21                                                             | 0.04                                                                   | 11.23                                                              | 0.01 <sup>#</sup>                                                       |
| <i>MAPT</i>      | 0                                    | 2                                       | 46                                             | 0.41                                                              | 1.00                                                                   | 0.08                                                               | 5.067x10 <sup>-3</sup> #                                                |

|                |    |    |    |       |                         |       |                          |
|----------------|----|----|----|-------|-------------------------|-------|--------------------------|
| <i>MATR3</i>   | NA | NA | NA | NA    | NA                      | NA    | NA                       |
| <i>MOBP</i>    | NA | NA | NA | NA    | NA                      | NA    | NA                       |
| <i>NEFH</i>    | 0  | 1  | 8  | 0.68  | 1.00                    | 0.44  | 0.61                     |
| <i>NEK1</i>    | 25 | 4  | 29 | 12.80 | 4.59x10 <sup>-9</sup> * | 6.48  | 3.03x10 <sup>-10</sup> # |
| <i>OPTN</i>    | 13 | 4  | 38 | 6.60  | 3.04x10 <sup>-4</sup>   | 2.56  | 6.90x10 <sup>-3</sup>    |
| <i>PFNI</i>    | NA | NA | NA | NA    | NA                      | NA    | NA                       |
| <i>PNPLA6</i>  | 3  | 8  | 44 | 0.76  | 1.00                    | 0.51  | 0.36                     |
| <i>PRPH</i>    | 1  | 2  | 20 | 1.01  | 1.00                    | 0.37  | 0.50                     |
| <i>SCFD1</i>   | 0  | 1  | 12 | 0.68  | 1.00                    | 0.30  | 0.38                     |
| <i>SETX</i>    | 1  | 4  | 28 | 0.51  | 1.00                    | 0.27  | 0.25                     |
| <i>SIGMAR1</i> | 1  | 0  | 3  | 6.09  | 0.33                    | 2.49  | 0.39                     |
| <i>SOD1</i>    | 1  | 1  | 2  | 2.03  | 0.55                    | 3.74  | 0.31                     |
| <i>SQSTM1</i>  | 0  | 3  | 9  | 0.11  | 0.56                    | 0.39  | 0.61                     |
| <i>TAF15</i>   | NA | NA | NA | NA    | NA                      | NA    | NA                       |
| <i>TARDBP</i>  | NA | NA | NA | NA    | NA                      | NA    | NA                       |
| <i>TBK1</i>    | 5  | 0  | 3  | 22.34 | 3.92x10 <sup>-3</sup>   | 12.48 | 9.35x10 <sup>-4</sup> #  |
| <i>UBQLN2</i>  | NA | NA | NA | NA    | NA                      | NA    | NA                       |
| <i>UNC13A</i>  | NA | NA | NA | NA    | NA                      | NA    | NA                       |
| <i>VAPB</i>    | NA | NA | NA | NA    | NA                      | NA    | NA                       |
| <i>VCP</i>     | NA | NA | NA | NA    | NA                      | NA    | NA                       |

\*Passed exome-wide significance (P-value <2.5x10<sup>-6</sup>) in first analysis (3,864 cases and 7,839 controls).

#OR direction is maintained in secondary analysis (3,864 cases and 28,910 controls) and P-value is lower.

NA values in cells implies there were no qualifying variants in this gene under this model.

**Table S5. Proposed ALS genes and their signals under the damaging missense model**

| Gene             | Qualifying variants in cases (3,864) | Qualifying variants in controls (7,839) | Qualifying variants in total controls (28,910) | OR<br>N <sub>cases</sub> : 3,864<br>N <sub>controls</sub> : 7,839 | P-value<br>N <sub>cases</sub> : 3,864<br>N <sub>controls</sub> : 7,839 | OR<br>N <sub>cases</sub> : 3,864<br>N <sub>controls</sub> : 28,910 | P-value<br>N <sub>cases</sub> : 3,864<br>N <sub>controls</sub> : 28,910 |
|------------------|--------------------------------------|-----------------------------------------|------------------------------------------------|-------------------------------------------------------------------|------------------------------------------------------------------------|--------------------------------------------------------------------|-------------------------------------------------------------------------|
| <i>ALS2</i>      | 7                                    | 17                                      | 73                                             | 0.84                                                              | 0.83                                                                   | 0.72                                                               | 0.49                                                                    |
| <i>ANG</i>       | 0                                    | 2                                       | 8                                              | 0.41                                                              | 1.00                                                                   | 0.44                                                               | 0.61                                                                    |
| <i>ARHGEF28</i>  | 12                                   | 14                                      | 128                                            | 1.74                                                              | 0.21                                                                   | 0.70                                                               | 0.29                                                                    |
| <i>ARPP21</i>    | 3                                    | 5                                       | 55                                             | 1.22                                                              | 0.72                                                                   | 0.41                                                               | 0.15                                                                    |
| <i>ATXN2</i>     | NA                                   | NA                                      | NA                                             | NA                                                                | NA                                                                     | NA                                                                 | NA                                                                      |
| <i>C21orf2</i>   | 1                                    | 3                                       | 33                                             | 0.68                                                              | 1.00                                                                   | 0.23                                                               | 0.18                                                                    |
| <i>C9orf72</i>   | 1                                    | 5                                       | 25                                             | 0.41                                                              | 0.67                                                                   | 0.30                                                               | 0.36                                                                    |
| <i>CENPV</i>     | 1                                    | 2                                       | 13                                             | 1.01                                                              | 1.00                                                                   | 0.58                                                               | 1.00                                                                    |
| <i>CHMP2B</i>    | 3                                    | 1                                       | 9                                              | 6.09                                                              | 0.11                                                                   | 2.49                                                               | 0.16                                                                    |
| <i>DAO</i>       | 3                                    | 20                                      | 114                                            | 0.30                                                              | 0.05                                                                   | 0.20                                                               | 7.52x10 <sup>-4</sup> #                                                 |
| <i>DCTN1</i>     | 9                                    | 15                                      | 70                                             | 1.22                                                              | 0.67                                                                   | 0.96                                                               | 1.00                                                                    |
| <i>FIG4</i>      | 7                                    | 11                                      | 51                                             | 1.29                                                              | 0.62                                                                   | 1.03                                                               | 0.84                                                                    |
| <i>FUS</i>       | 0                                    | 2                                       | 7                                              | 0.41                                                              | 1.00                                                                   | 0.50                                                               | 1.00                                                                    |
| <i>GRN</i>       | 11                                   | 13                                      | 59                                             | 1.72                                                              | 0.20                                                                   | 1.40                                                               | 0.35                                                                    |
| <i>HNRNPA1</i>   | NA                                   | NA                                      | NA                                             | NA                                                                | NA                                                                     | NA                                                                 | NA                                                                      |
| <i>HNRNPA2B1</i> | 0                                    | 1                                       | 2                                              | 0.68                                                              | 1.00                                                                   | 1.50                                                               | 1.00                                                                    |
| <i>KIF5A</i>     | 3                                    | 8                                       | 31                                             | 0.76                                                              | 1.00                                                                   | 0.72                                                               | 0.79                                                                    |
| <i>MAPT</i>      | 7                                    | 8                                       | 49                                             | 1.78                                                              | 0.28                                                                   | 1.07                                                               | 0.84                                                                    |
| <i>MATR3</i>     | 6                                    | 2                                       | 7                                              | 6.09                                                              | 0.02                                                                   | 6.42                                                               | 2.19x10 <sup>-3</sup> #                                                 |

|                |    |    |     |       |                          |       |                          |
|----------------|----|----|-----|-------|--------------------------|-------|--------------------------|
| <i>MOBP</i>    | NA | NA | NA  | NA    | NA                       | NA    | NA                       |
| <i>NEFH</i>    | NA | NA | NA  | NA    | NA                       | NA    | NA                       |
| <i>NEK1</i>    | 10 | 22 | 93  | 0.92  | 1.00                     | 0.80  | 0.65                     |
| <i>OPTN</i>    | 12 | 5  | 34  | 4.88  | 2.79x10 <sup>-3</sup>    | 2.65  | 8.99x10 <sup>-3</sup>    |
| <i>PFN1</i>    | 0  | 1  | 65  | 0.68  | 1.00                     | 0.06  | 6.70x10 <sup>-4</sup> #  |
| <i>PNPLA6</i>  | 7  | 11 | 67  | 1.29  | 0.62                     | 0.78  | 0.72                     |
| <i>PRPH</i>    | 8  | 13 | 69  | 1.25  | 0.65                     | 0.87  | 0.86                     |
| <i>SCFD1</i>   | 3  | 8  | 35  | 0.76  | 1.00                     | 0.64  | 0.62                     |
| <i>SETX</i>    | 32 | 48 | 265 | 1.36  | 0.19                     | 0.90  | 0.65                     |
| <i>SIGMAR1</i> | 1  | 2  | 18  | 1.01  | 1.00                     | 0.42  | 0.72                     |
| <i>SOD1</i>    | 21 | 0  | 2   | 87.70 | 7.55x10 <sup>-11</sup> * | 78.98 | 6.04x10 <sup>-18</sup> # |
| <i>SQSTM1</i>  | 5  | 11 | 38  | 0.92  | 1.00                     | 0.98  | 1.00                     |
| <i>TAF15</i>   | NA | NA | NA  | NA    | NA                       | NA    | NA                       |
| <i>TARDBP</i>  | NA | NA | NA  | NA    | NA                       | NA    | NA                       |
| <i>TBK1</i>    | 6  | 5  | 24  | 2.44  | 0.20                     | 1.87  | 0.16                     |
| <i>UBQLN2</i>  | 0  | 3  | 15  | 0.29  | 0.56                     | 0.24  | 0.24                     |
| <i>UNC13A</i>  | 7  | 6  | 49  | 2.37  | 0.14                     | 1.07  | 0.84                     |
| <i>VAPB</i>    | 2  | 1  | 4   | 4.06  | 0.26                     | 3.74  | 0.15                     |
| <i>VCP</i>     | 6  | 0  | 18  | 26.41 | 1.29x10 <sup>-3</sup>    | 2.50  | 0.06                     |

\*Passed exome-wide significance (P-value <2.5x10<sup>-6</sup>) in first analysis (3,864 cases and 7,839 controls).

#OR direction is maintained in secondary analysis (3,864 cases and 28,910 controls) and P-value is lower.

NA values in cells implies there were no qualifying variants in this gene under this model.

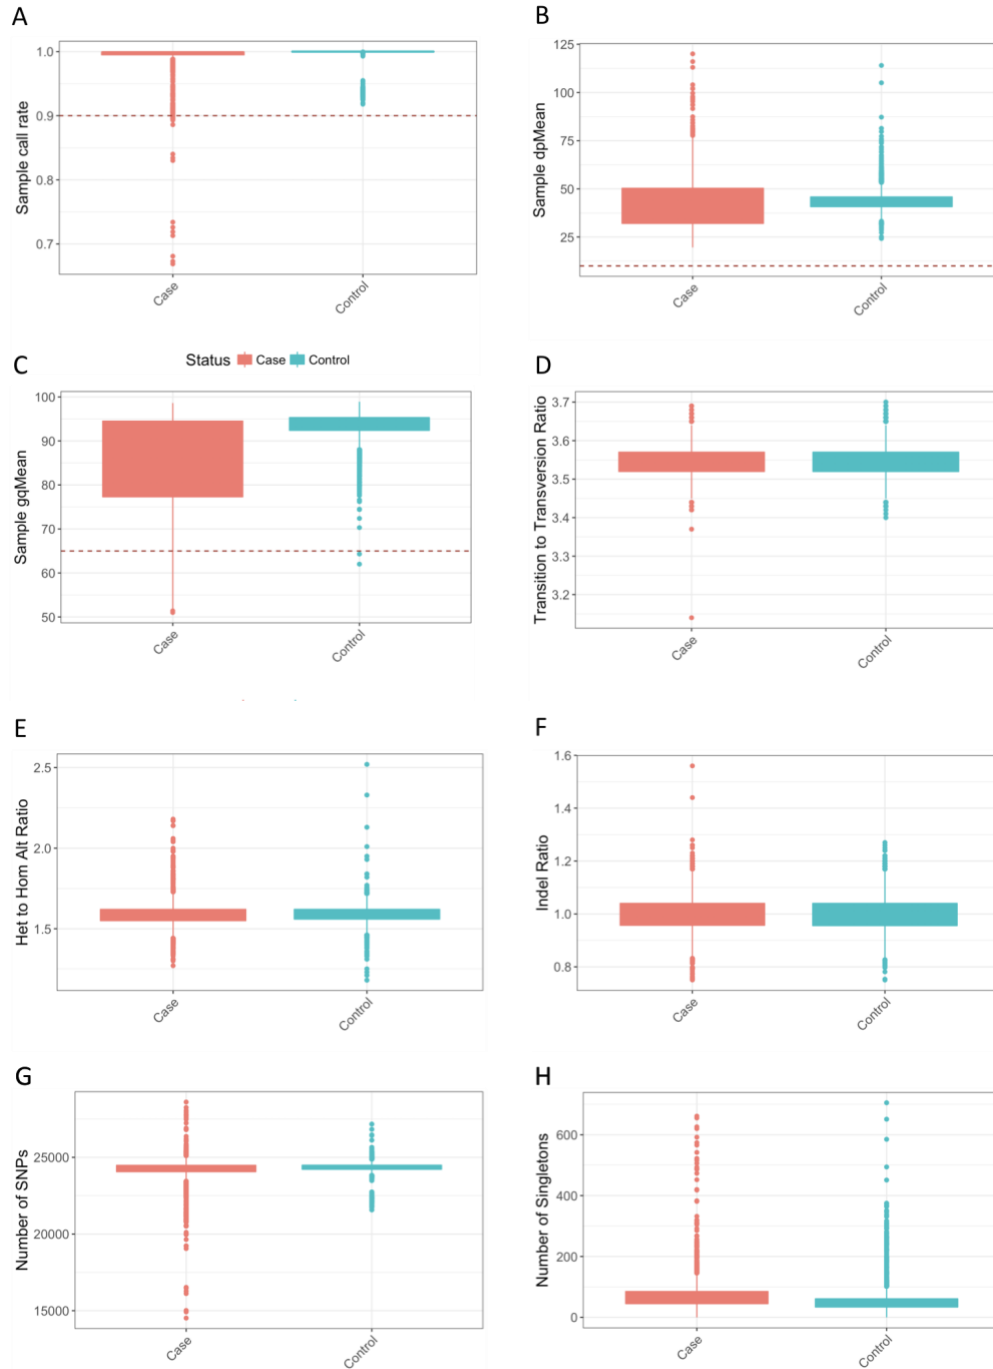

**Figure S1. Initial sample quality control analysis**

(A) Sample call rate. (B) Sample mean depth. (C) Sample mean genotype quality. (D) Sample transition to transversion ratio. (E) Sample heterozygous to homozygous ratio. (F) Sample insertion to deletion ratio. (G) Number of SNPs in each sample. (H) Number of singletons in each sample.



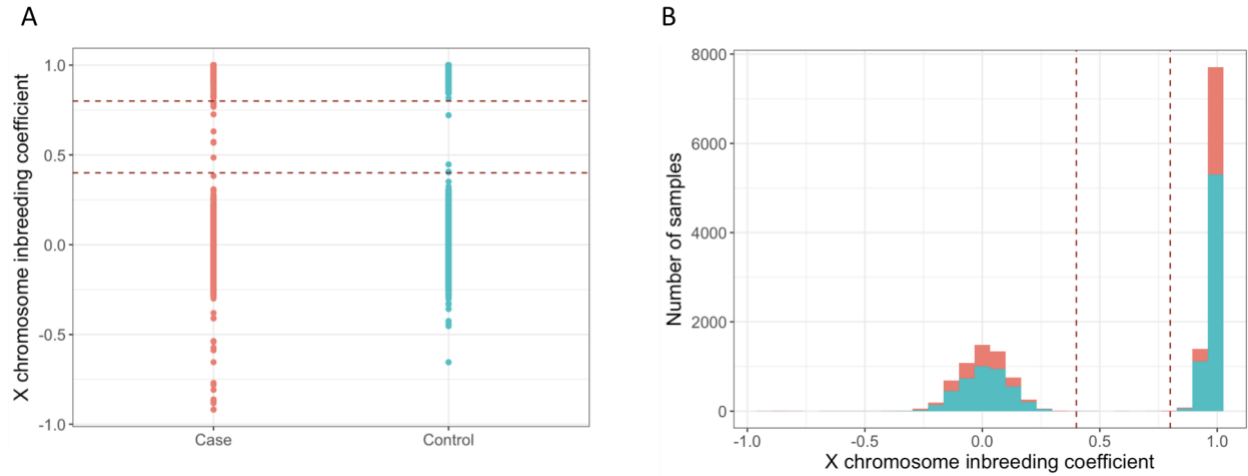

**Figure S2. Sex imputation analysis**

We excluded samples with ambiguous sex status. Samples with an X chromosome inbreeding coefficient  $>0.8$  were classified as males and samples with an X chromosome inbreeding coefficient  $<0.4$  were classified as females. Samples  $<0.8$  and  $>0.4$  were classified as samples with ambiguous sex status. (A) and (B) are depicting the same data of sex status between cases and controls differently.

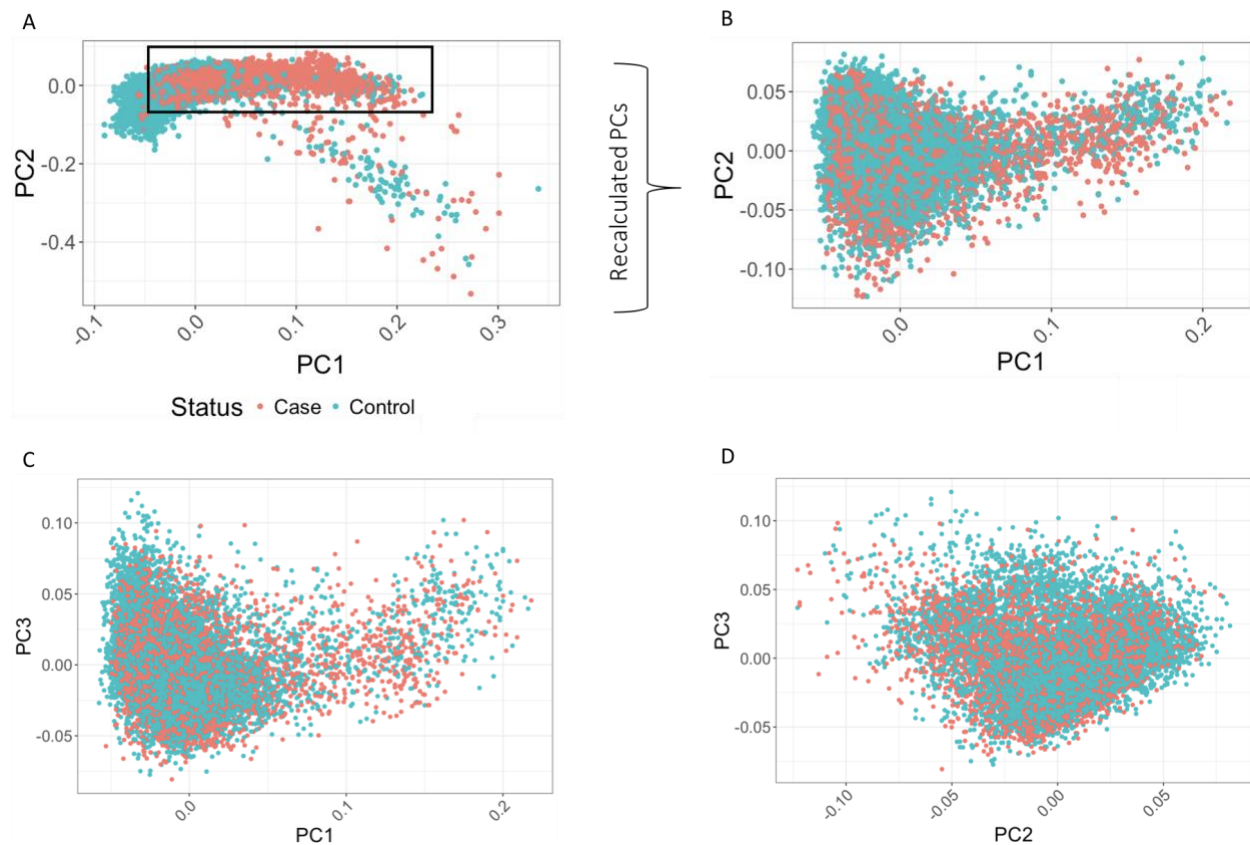

**Figure S3. Principal component analysis of ALS dataset**

(A) PC1 and PC2 of ALS dataset, cases are in red, and controls are in blue. All samples outside of the black rectangle were excluded from the dataset to prevent any false signals due to ancestry.

(B) PC1 and PC2 of ALS dataset after removing non-overlapping samples and recalculating the PCs.

(C) PC1 and PC3 of ALS dataset after removing non-overlapping samples and recalculating the PCs.

(D) PC2 and PC3 of ALS dataset after removing non-overlapping samples and recalculating the PCs.

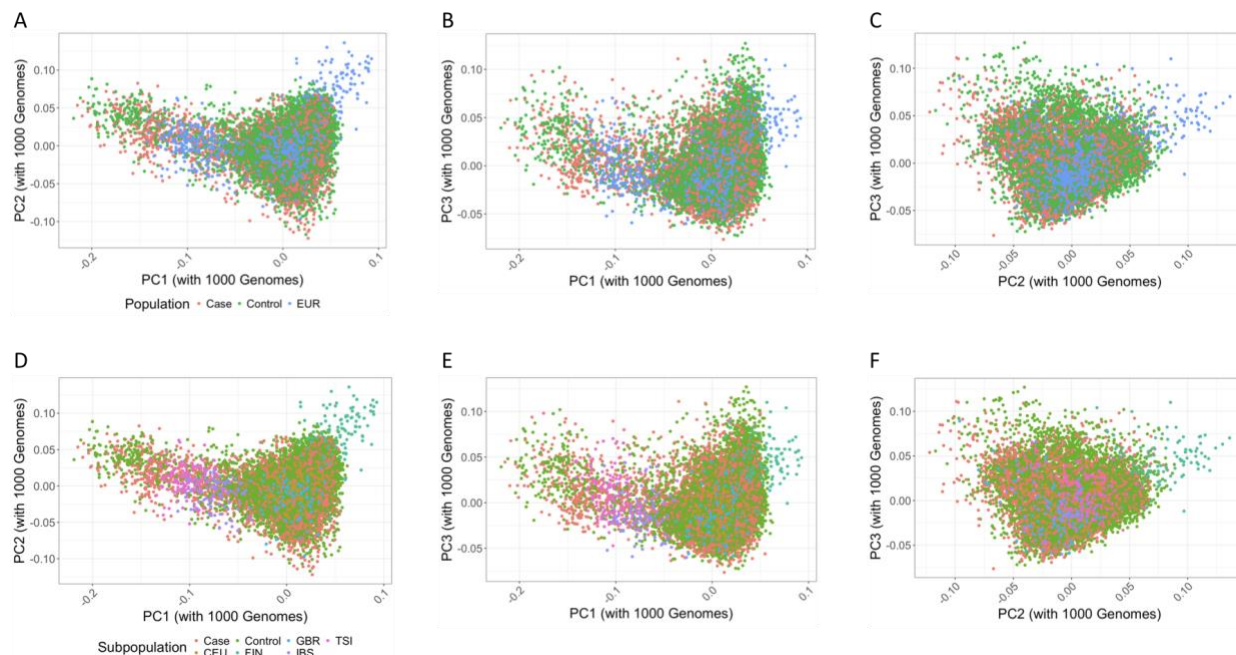

**Figure S4. Principal component analysis of ALS dataset with 1000 Genomes**

(A) PC1 and PC2 of ALS dataset with 1000 Genomes. Cases, controls, and the European population is shown.

(B) PC1 and PC3 of ALS dataset with 1000 Genomes. Cases, controls, and the European population is shown.

(C) PC2 and PC3 of ALS dataset with 1000 Genomes. Cases, controls, and the European population is shown.

(D) PC1 and PC2 of ALS dataset with 1000 Genomes. Cases, controls, and the European subpopulations are shown.

(E) PC1 and PC3 of ALS dataset with 1000 Genomes. Cases, controls, and the European subpopulations are shown.

(F) PC2 and PC3 of ALS dataset with 1000 Genomes. Cases, controls, and the European subpopulations are shown.

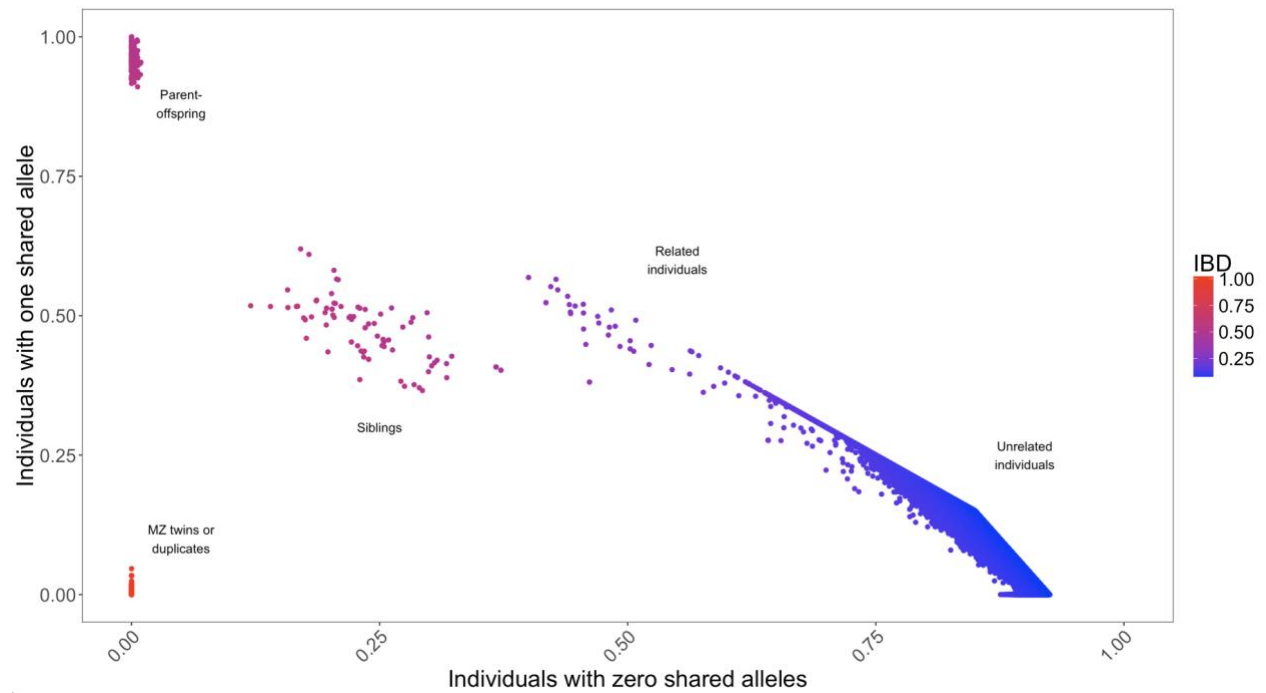

**Figure S5. Identity-by-descent analysis to remove related individuals. Only unrelated individuals (dark blue) were included in our dataset**

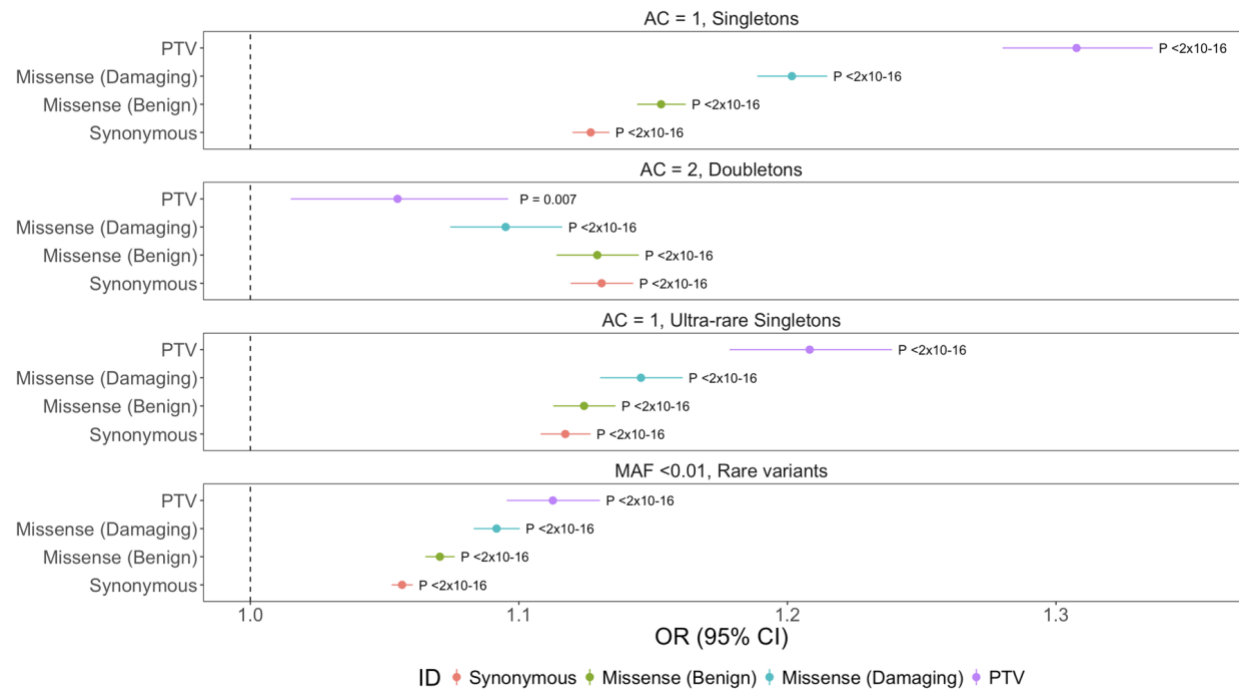

**Figure S6. Exome wide analysis of variants in cases and controls within model 1 (sample variation only)**

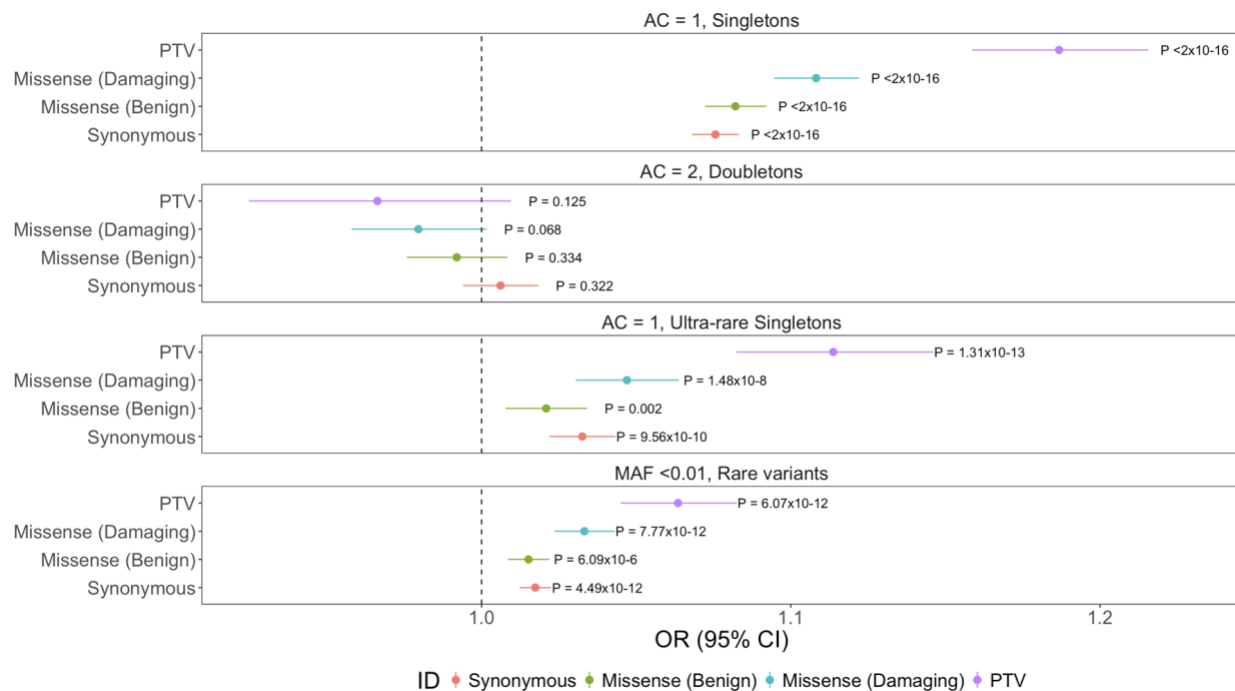

**Figure S7. Exome wide analysis of variants in cases and controls within model 2 (sample variation, sample sex, and PC1-PC10)**

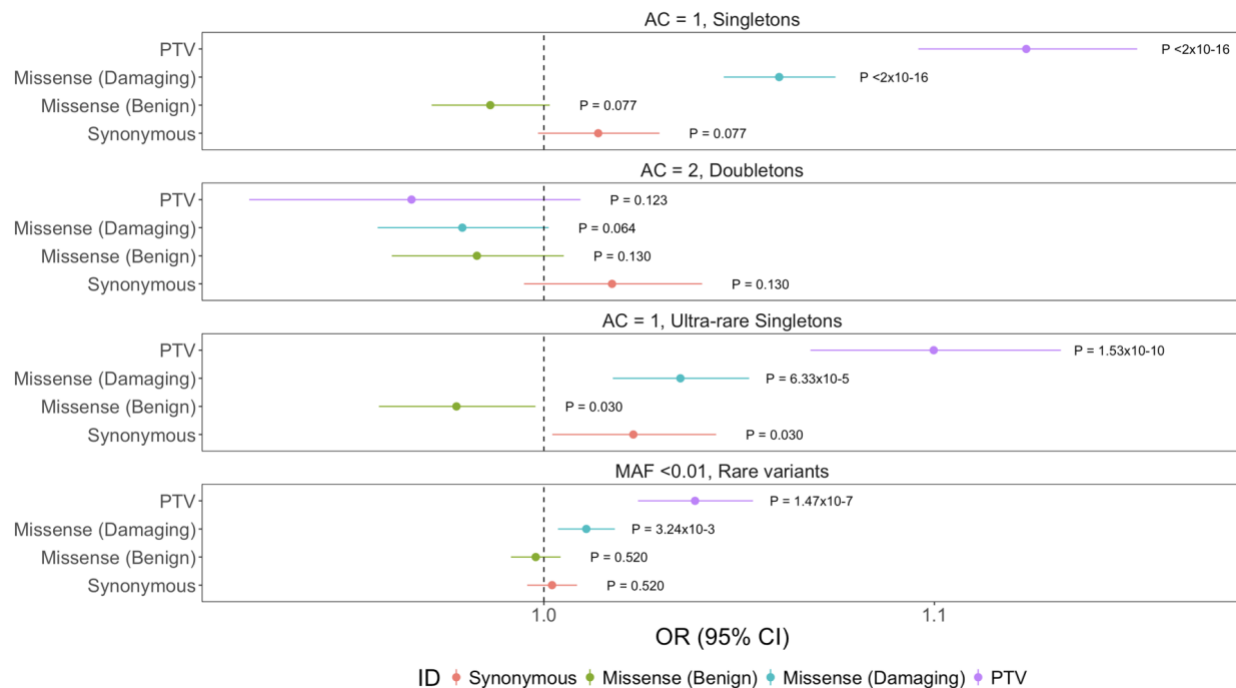

**Figure S8. Exome wide analysis of variants in cases and controls within model 4 (sample variation, sample sex, PC1-PC10, and benign variation count, summation of synonymous and benign missense variation)**

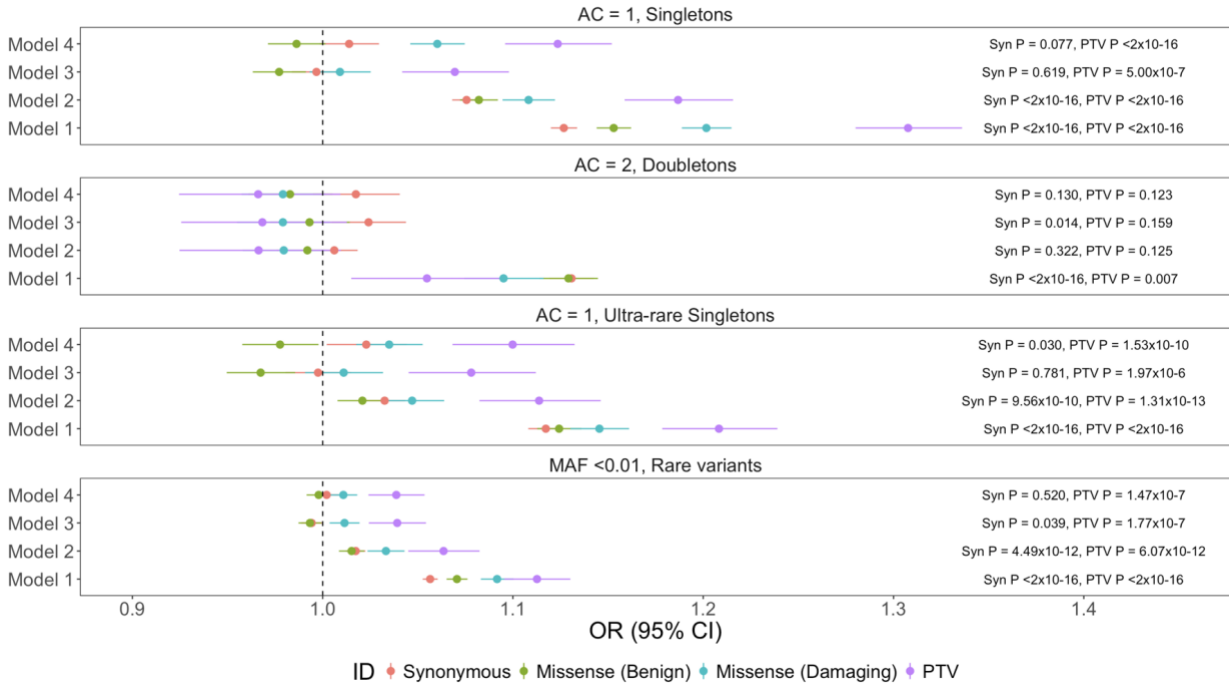

**Figure S9. All models together**

Model 1: Sample variation.

Model 2: Sample variation, sample sex, PC1-PC10.

Model 3: Sample variation, sample sex, PC1-PC10, and total exome count (summation of synonymous, benign missense, damaging missense, and PTV).

Model 4: Sample variation, sample sex, PC1-PC10, and benign variation count (summation of synonymous and benign missense variation).



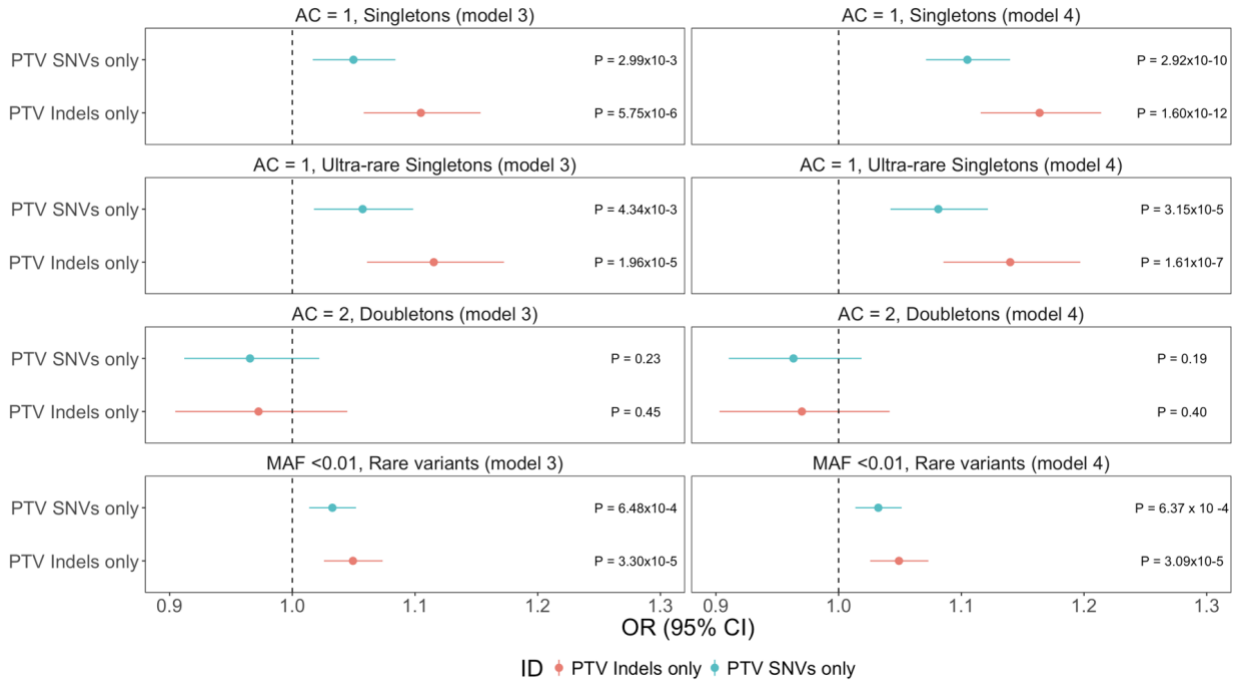

**Figure S10. Exome wide enrichment of SNV-based PTVs and indel-based PTVs in ALS cases**

Extension of Figure 1: Evaluating the effects of SNV-based and indel-based PTVs within singletons (AC=1), doubletons (AC=2), ultra-rare singletons (AC=1, 0 in DiscovEHR), and rare variants (MAF<0.01 in our dataset, DiscovEHR and ExAC). Odds ratios and 95% confidence intervals for each class of variation are depicted by different colors. P-values are also displayed. Model 3 evaluates sample variation with the covariates, sample sex, PC1-10, and total exome count (summation of synonymous variation, benign missense variation, damaging missense variation, and PTV SNV or PTV indel). Model 4 evaluates sample variation with the covariates, sample sex, PC1-10, and benign variation (summation of synonymous and benign missense variation).

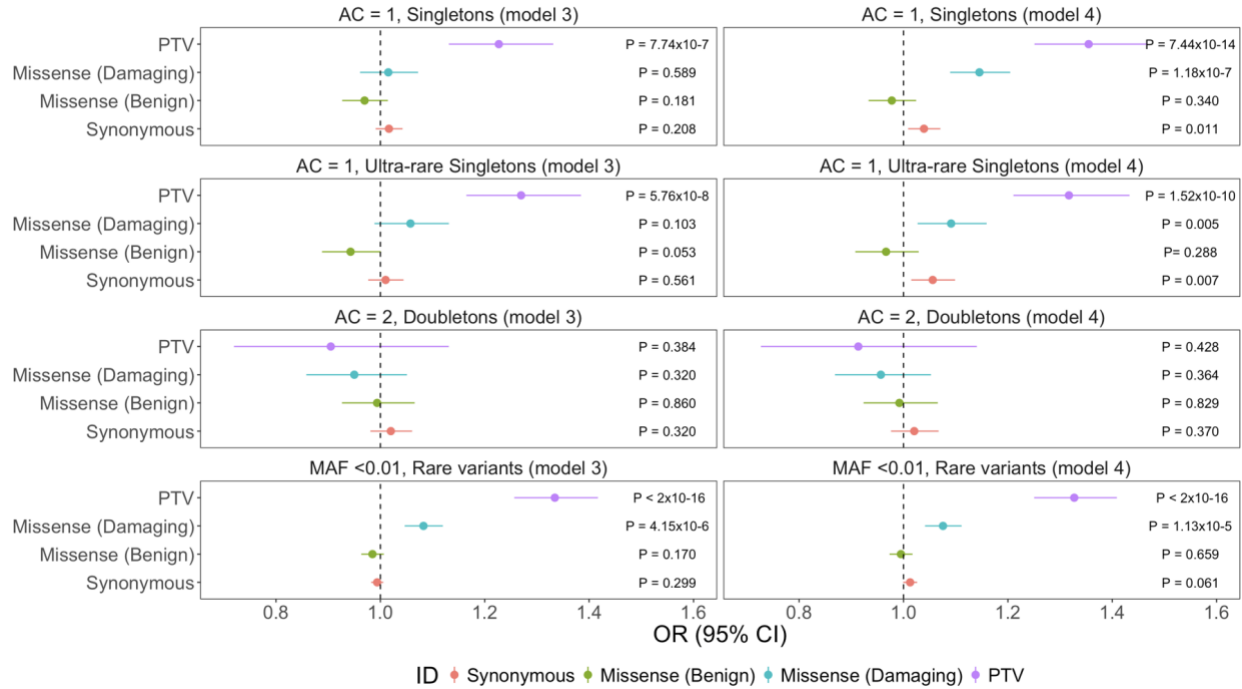

**Figure S11. Enrichment of variants in constrained genes in ALS cases**

Extension of Figure 2A: Evaluating the effects of constrained genes in synonymous variants, benign missense variants, damaging missense variants, and PTVs within singletons (AC=1), doubletons (AC=2), ultra-rare singletons (AC=1, 0 in DiscovEHR), and rare variants (MAF<0.01 in our dataset, DiscovEHR and ExAC). Odds ratios and 95% confidence intervals for each class of variation are depicted by different colors. P-values are also displayed. Model 3 evaluates sample variation with the covariates, sample sex, PC1-10, and total exome count (summation of synonymous variation, benign missense variation, damaging missense variation, and PTV). Model 4 evaluates sample variation with the covariates, sample sex, PC1-10, and benign variation (summation of synonymous and benign missense variation).

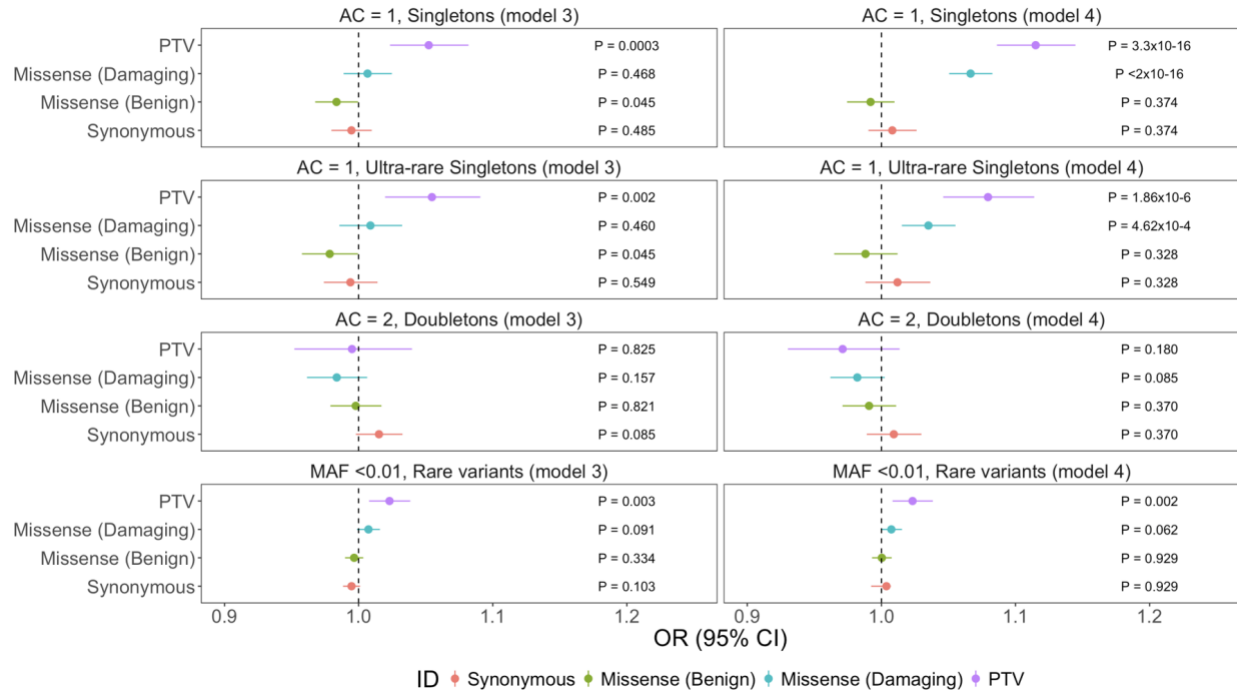

**Figure S12. Exome-wide analysis with constrained genes removed**

Extension of Figure 2B: Evaluating the residual effects with constrained genes removed in synonymous variants, benign missense variants, damaging missense variants, and PTVs within singletons (AC=1), doubletons (AC=2), ultra-rare singletons (AC=1, 0 in DiscovEHR), and rare variants (MAF<0.01 in our dataset, DiscovEHR and ExAC). Odds ratios and 95% confidence intervals for each class of variation are depicted by different colors. P-values are also displayed. Model 3 evaluates sample variation with the covariates, sample sex, PC1-10, and total exome count (summation of synonymous variation, benign missense variation, damaging missense variation, and PTV). Model 4 evaluates sample variation with the covariates, sample sex, PC1-10, and benign variation (summation of synonymous and benign missense variation).

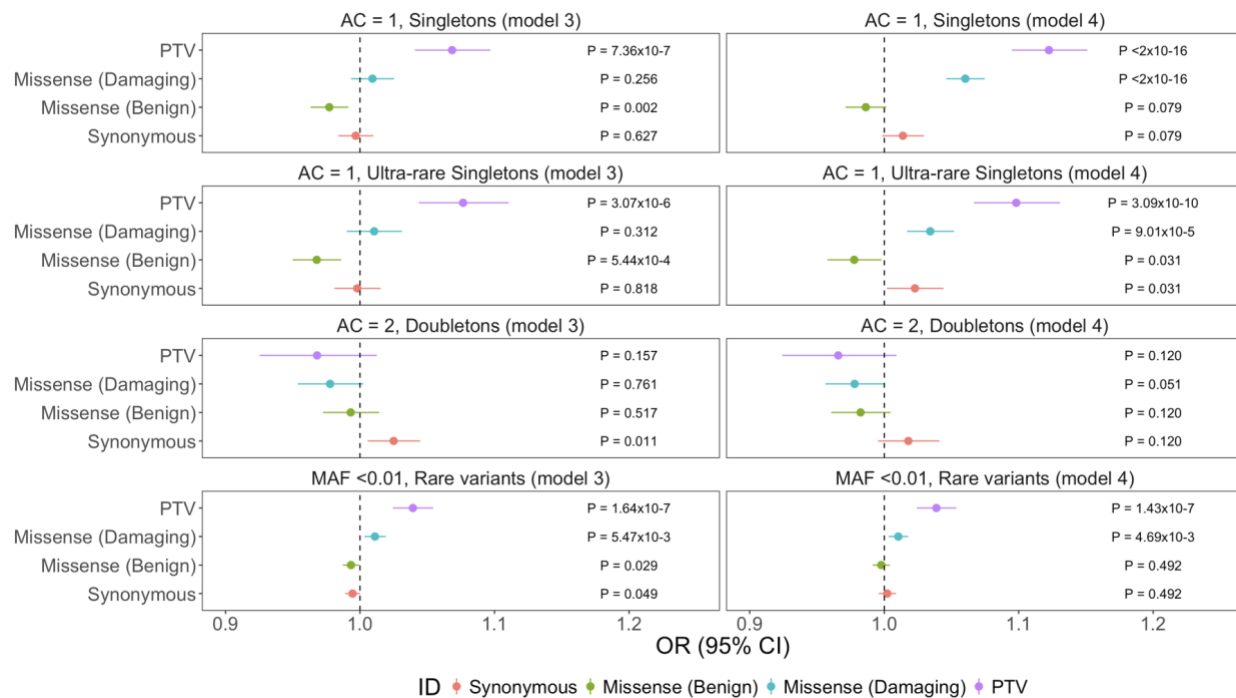

**Figure S13. Exome-wide analysis with known ALS genes removed**

Extension of Figure 3A: Evaluating the effects of known ALS genes removed in synonymous variants, benign missense variants, damaging missense variants, and PTVs within singletons (AC=1), doubletons (AC=2), ultra-rare singletons (AC=1, 0 in DiscovEHR), and rare variants (MAF<0.01 in our dataset, DiscovEHR and ExAC). Odds ratios and 95% confidence intervals for each class of variation are depicted by different colors. P-values are also displayed. Model 3 evaluates sample variation with the covariates, sample sex, PC1-10, and total exome count (summation of synonymous variation, benign missense variation, damaging missense variation, and PTV). Model 4 evaluates sample variation with the covariates, sample sex, PC1-10, and benign variation (summation of synonymous and benign missense variation).

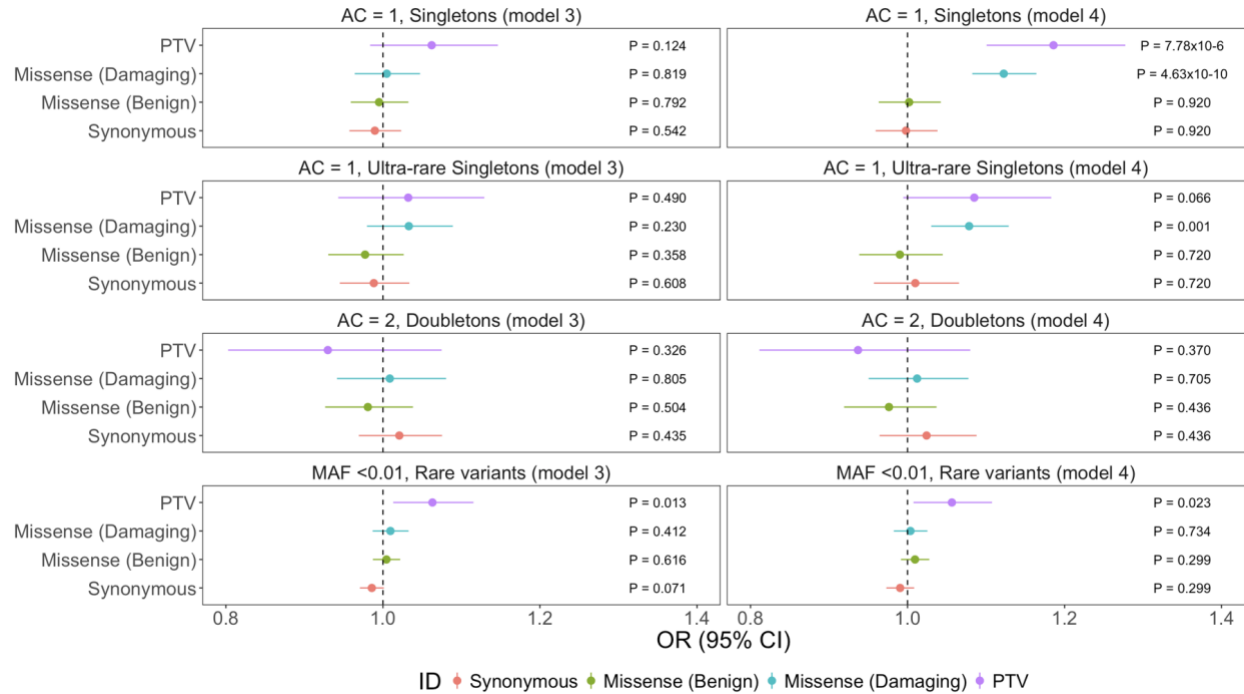

**Figure S14. Analysis of other neurodegenerative disease genes**

Extension of Figure 3B: Evaluating the effects of genes associated with other neurodegenerative disease (motor neuron diseases: primary lateral sclerosis, progressive muscular atrophy, progressive bulbar palsy, and spinal muscular atrophy; diseases with overlapping phenotypes: frontotemporal dementia, Parkinson's disease, Pick's disease, and Alzheimer's disease) in synonymous variants, benign missense variants, damaging missense variants, and PTVs within singletons (AC=1), doubletons (AC=2), ultra-rare singletons (AC=1, 0 in DiscovEHR), and rare variants (MAF<0.01 in our dataset, DiscovEHR and ExAC). Odds ratios and 95% confidence intervals for each class of variation are depicted by different colors. P-values are also displayed. Model 3 evaluates sample variation with the covariates, sample sex, PC1-10, and total exome count (summation of synonymous variation, benign missense variation, damaging missense variation, and PTV). Model 4 evaluates sample variation with the covariates, sample sex, PC1-10, and benign variation (summation of synonymous and benign missense variation).

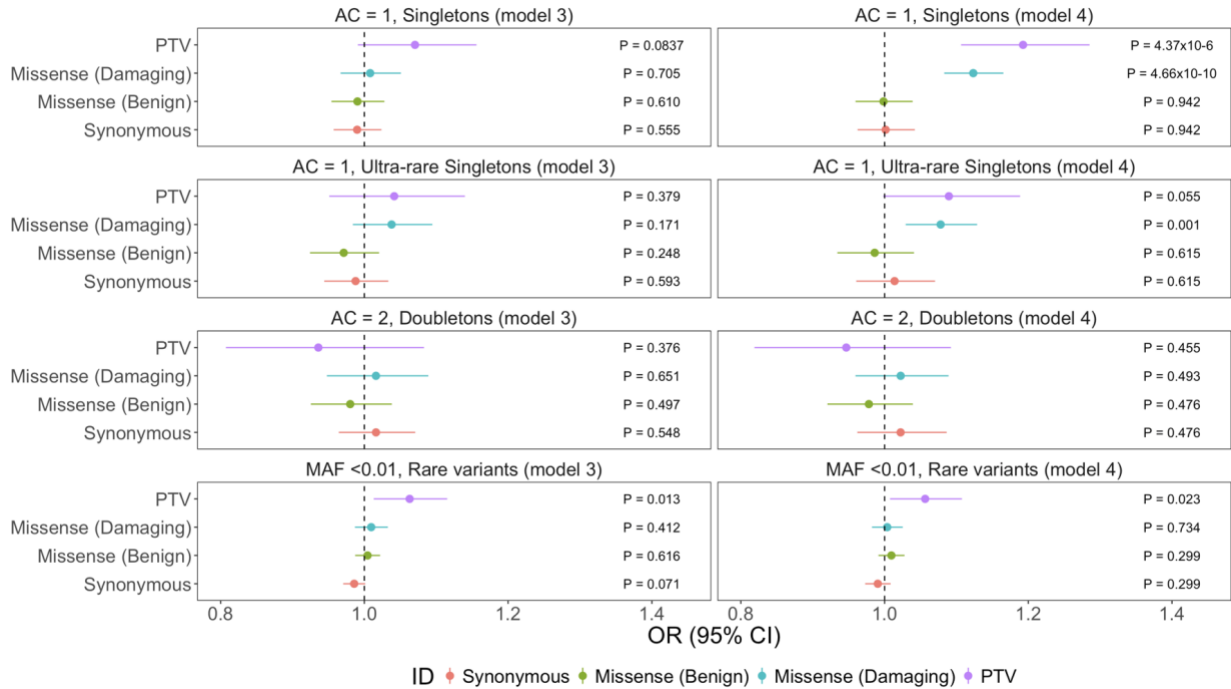

**Figure S15. Analysis of brain specific genes**

Extension of Figure 3C: Analysis of brain specific genes in synonymous variants, benign missense variants, damaging missense variants, and PTVs within singletons (AC=1), doubletons (AC=2), ultra-rare singletons (AC=1, 0 in DiscovEHR), and rare variants (MAF<0.01 in our dataset, DiscovEHR and ExAC). Odds ratios and 95% confidence intervals for each class of variation are depicted by different colors. P-values are also displayed. Model 3 evaluates sample variation with the covariates, sample sex, PC1-10, and total exome count (summation of synonymous variation, benign missense variation, damaging missense variation, and PTV). Model 4 evaluates sample variation with the covariates, sample sex, PC1-10, and benign variation (summation of synonymous and benign missense variation).

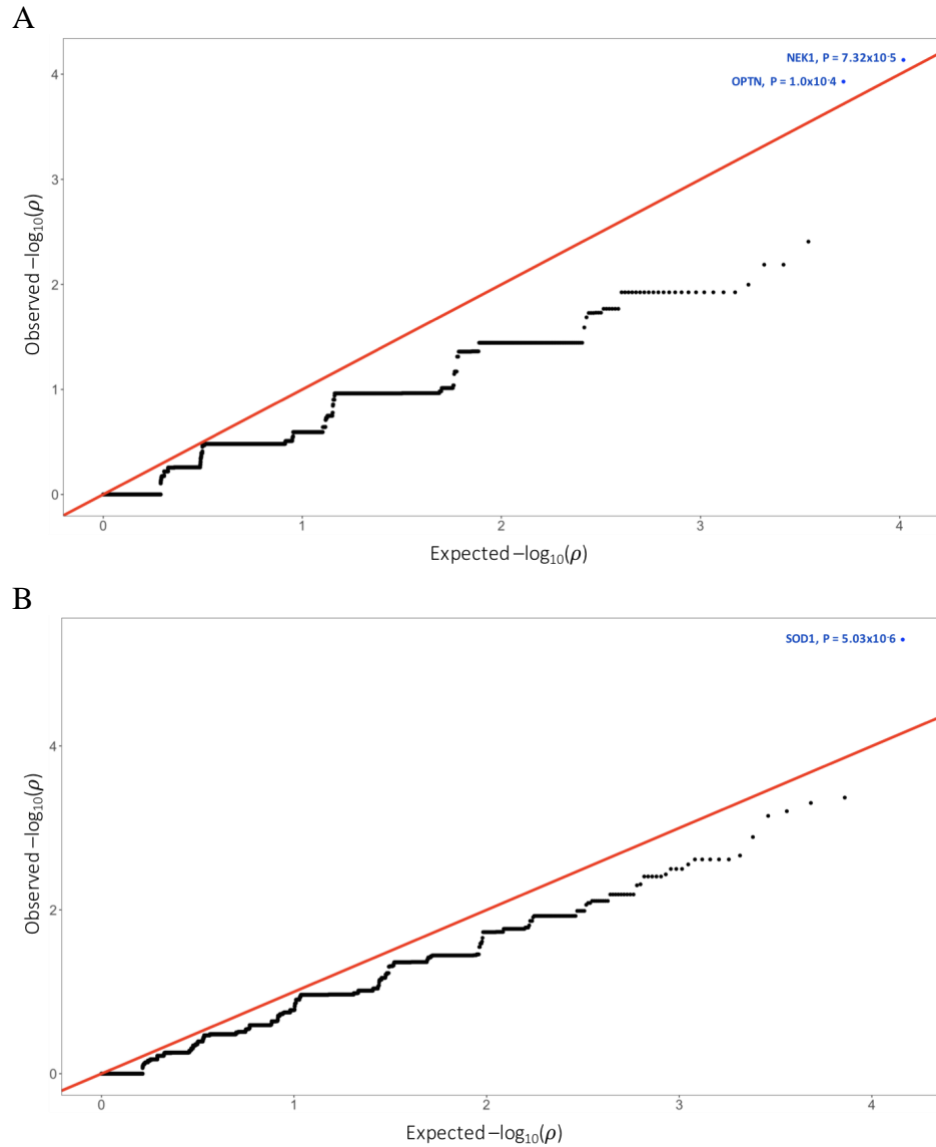

**Figure S16. Quantile-quantile plot of ultra-rare singletons**

(A) Ultra-rare singleton (AC=1, 0 in DiscovEHR database) for PTV. PTVs in *NEK1* and *OPTN*, which are known ALS genes, are enriched in ALS cases. *NEK1* and *OPTN* P-values are displayed.

(B) Ultra-rare singleton (AC=1, 0 in DiscovEHR database) for damaging missense variants. Damaging missense variants in *SOD1* are enriched in ALS cases. *SOD1* P-value is displayed.

A

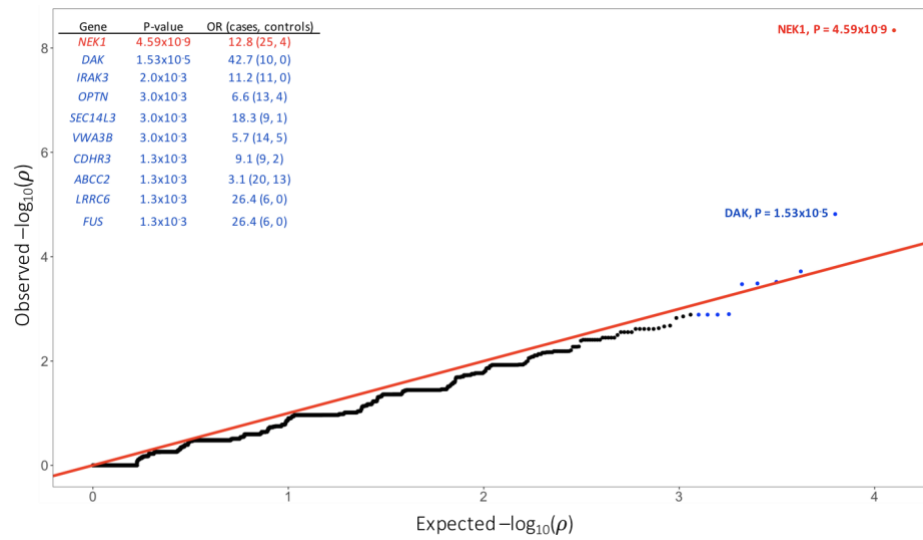

B

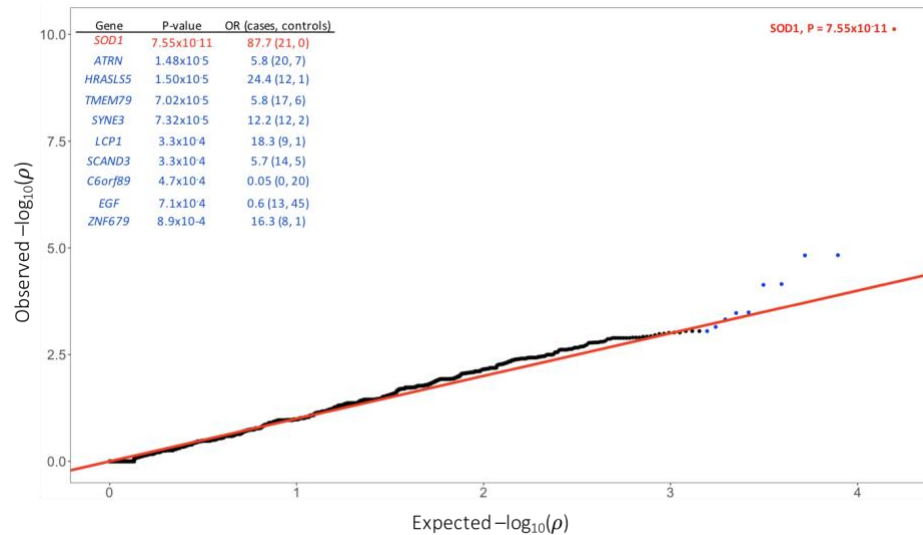

**Figure S17. Quantile-quantile plot of rare variants (MAF < 0.001)**

(A) Rare PTVs (MAF < 0.001% in dataset, DiscovEHR, and ExAC) in ALS dataset. PTVs in *NEK1* and *DAK* are enriched in ALS cases. The top 10 genes with their P-values are displayed. *NEK1* passes exome-wide significance.

(B) Rare damaging missense variants (MAF < 0.001% in dataset, DiscovEHR, and ExAC) in ALS dataset. Damaging missense variants in *SOD1* are enriched in ALS cases. The top 10 genes with their P-values are displayed. *SOD1* passes exome-wide significance.



A

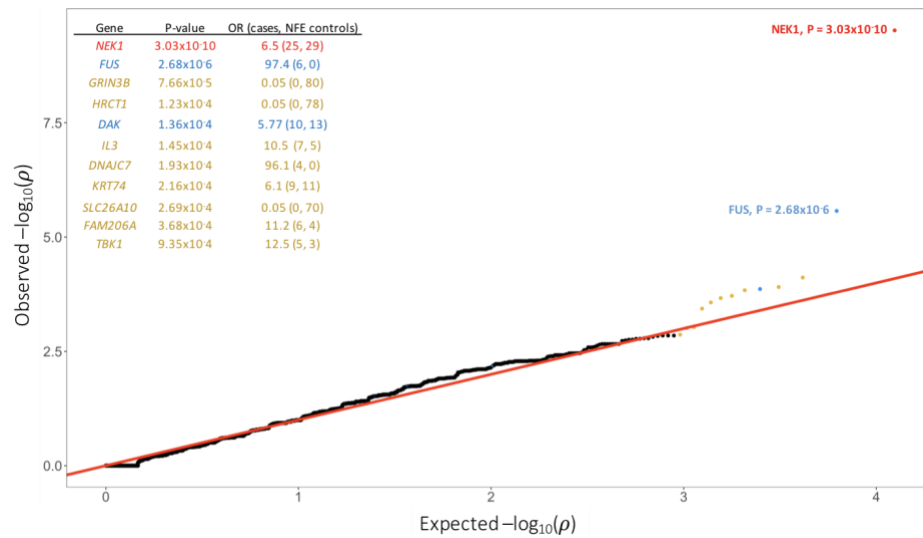

B

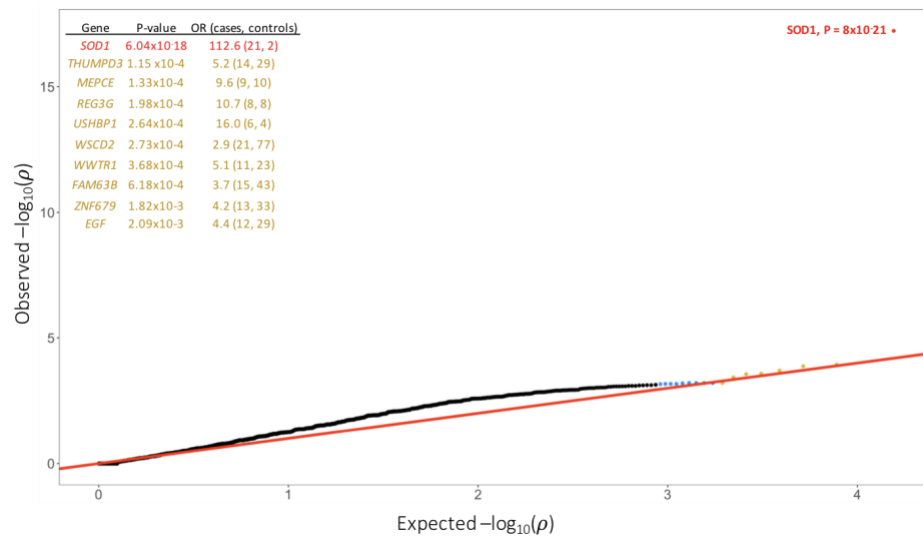

**Figure S18. Quantile-quantile plot of rare variants (MAF<0.001%)**

(A) Rare PTVs (MAF<0.001% in dataset, DiscovEHR, and ExAC) in ALS cases with an additional 21,071 non-Finnish European controls from ExAC for a total of 28,910 controls. The top 10 genes with their P-values are displayed. *NEK1* is shown in red and passes exome-wide significance. Genes in blue were the most significant genes in the discovery analysis. *FUS* is shown in blue and approaches exome-wide significance. Genes in yellow were the most significant genes in the secondary analysis.

(B) Rare damaging missense variants (MAF<0.001% in dataset, DiscovEHR, and ExAC) in ALS cases with an additional 21,071 non-Finnish European controls from ExAC for a total of 28,910 controls. The top 10 genes with their P-values are displayed. *SOD1* is shown in red and passes

exome-wide significance. Genes in blue were the most significant genes in the discovery analysis. Genes in yellow were the most significant genes in the secondary analysis.
